## Real life experience with atrial fibrillation cryoballoon ablation: results from a nationwide registry

T. Lubimceva<sup>1</sup>, A. Topchyan<sup>2</sup>, K. Davtyan<sup>2</sup>, E. Artykhina<sup>3</sup>, E. Tarasiyk<sup>4</sup>, A. Kosonogov<sup>5</sup>, D. Kryzhanovsky<sup>6</sup>, S. Korolev<sup>7</sup>, G. Kolunin<sup>8</sup>, I. Sagitov<sup>9</sup>, A. Nechepurenko<sup>10</sup>, N. Grachev<sup>11</sup>, R. Batalov<sup>12</sup>, D. Lebedev<sup>1</sup>, E. Mikhaylov<sup>1</sup>

<sup>1</sup>Almazov National Medical Research Centre, Saint Petersburg, Russian Federation; <sup>2</sup>National Research Center for Preventive Medicine, Moscow, Russian Federation; <sup>3</sup>AV Vishnevsky Institute of Surgery, Moscow, Russian Federation; <sup>4</sup>Amur State Medical Academy of the Ministry of Health, Blagoveshchensk, Russian Federation; <sup>5</sup>City Clinical Hospital No. 5 of the Nizhegorodskiy District, Nizhniy Novgorod, Russian Federation; <sup>6</sup>26 Hospital, Saint Petersburg, Russian Federation; <sup>7</sup>Federal Scientific and Clinical Centre of Specialized Care and Medical Technology of FMBA of Russia, Moscow, Russian Federation; <sup>8</sup>Tyumen Cardiology Research Center, Tyumen, Russian Federation; <sup>9</sup>Republic Cardiology Centre, Ufa, Russian Federation; <sup>10</sup>Federal Center of Cardiovascular Surgery, Astrakhan, Russian Federation; <sup>11</sup>Primorsky Regional Clinical Hospital, Vladivostok, Russian Federation; <sup>12</sup>Cardiology Research Institute Tomsk National Research Medical Centre Russian Academy of Sciences, Tomsk, Russian Federation

On behalf of Cryoregistry Russian Team

**Funding Acknowledgement:** Type of funding source: Public grant(s) – National budget only. Main funding source(s): Government of the Russian Federation

Cryoballoon ablation (CBA) is an effective strategy for AF management. The Russian Cryoballoon Atrial Fibrillation Ablation Registry (NCT03040037) is a prospective observational multicenter national registry that aims to provide real-world efficacy, safety and outcomes of this technology.

**Purpose:** To evaluate the CBA efficacy, types of adverse events following CBA based on a multicenter nationwide registry.

**Materials and methods:** A web-based registry platform was developed for prospective data entry. The platform consisted of 8 sections: AF ablation experience, patient and CBA characteristics, periprocedural management, 12-month FU, redo procedures, early and late procedure-related complications. Inclusion criteria were the following: indications for AF catheter ablation, planned CBA, a signed informed consent.

32 ablation centers and 1118 patients (572 males, a mean age 68.3±11.4) were included into the registry. Paroxysmal AF was presented in 722 pts, persistent AF – 350 pts, long standing persistent AF – 46 pts. The main underlying diseases were hypertension, coronary artery disease, chronic heart failure; less commonly - hypertrophic cardiomyopathy and dilated cardiomyopathy. The mean LA diameter was 44.7±11.1 mm, LVEF was 62.6±10.8%. The mean BMI was 32.3±3.5 kg/m<sup>2</sup>. Cardioversion prior to CBA was performed in 32.8%. There were different strategies of AF recurrence documentation: ECG, 24-hour ECG monitor, ECG loop recorder implantation.

**Results:** The mean temperature of cryoablation was –45.7±17.4 C. The mean fluoroscopy time was 23.98 mins. The mean patient procedure duration was 108.46 mins [min 30; max 266]. The combination of RFA and CBA was reported in 9 cases. Periprocedural anticoagulant therapy included: uninterrupted NOACs (535 pts), bridge anticoagulation (365 pts), uninterrupted warfarin (67 pts), anticoagulation initiated only after CBA (151 pts). Transesophageal echo-guided CBA was performed in 126 cases, intracardiac echocardiography-guided CBA was performed in 474 cases. Esophageal temperature was controlled in 16 cases.

A 12-months follow-up was completed in 906 pts (81.0%). Arrhythmia recurrence was documented in 238 cases (21.3%), mainly AF. Elective cardioversions were performed in 39 pts. Redo ablation procedures were performed in 122 cases. There were a wide range of antithrombotic therapy, as well as pts without anticoagulants despite the fact of AF recurrence. There were 35 (3.1%) CBA-related major adverse events. Esophageal damage was found in 3 cases. There were registered 3 deaths (1 – oncology, and 2 due to unknown cause), 1 MI, 3 persistent phrenic nerve dysfunctions, 3 valve dysfunctions.

**Conclusion:** This nationwide registry represents contemporary safety and efficacy of CBA for AF. A high success rate of the procedure has been shown during 12 months post procedure. Although a total low number of procedure-related complications has been noted, the occurrence of life-threatening adverse events calls for a caution.
